# Supplementary material for: Two unique self-penetrating metal–organic frameworks based on flexible tripodal ligands, Cu(ii) and N-containing bridging ligands
Source: Royal Society of Chemistry journal article supplement (doi:10.1039/c1ce05749a), 2011-01-01
Supplement: c1ce05749a.pdf [file c1ce05749a.pdf]

*Electronic Supplementary Information*

DOI: 10.1039/c1ce05749a

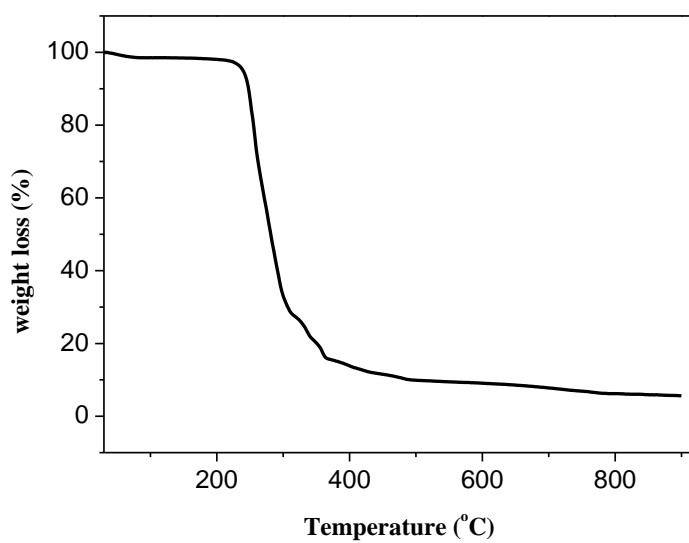

(a)

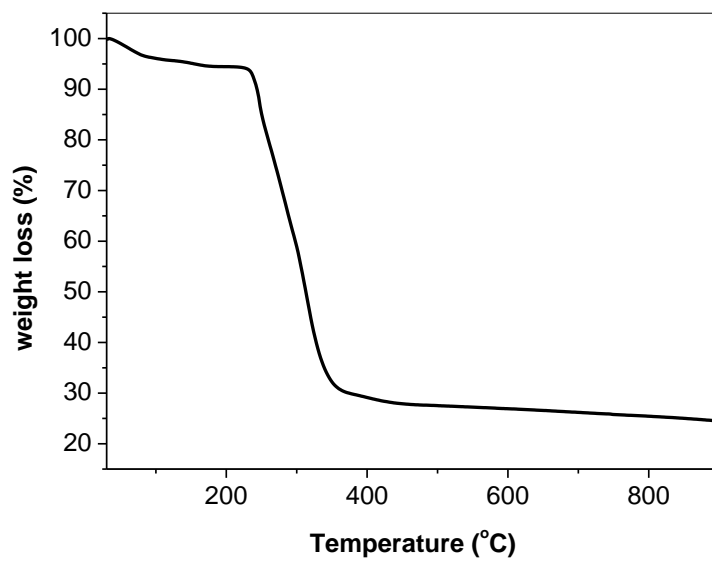

(b)

**Fig S1** Thermogravimetric curves of **1**(a) and **2** (b).

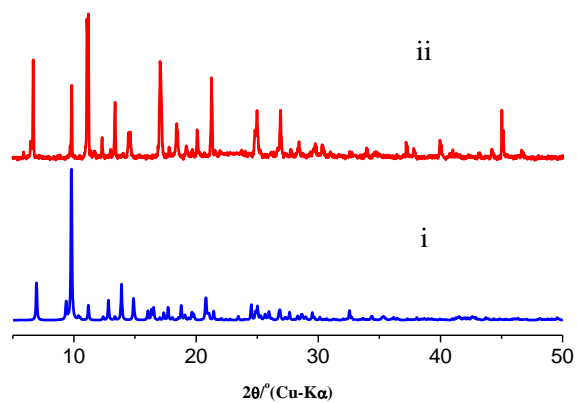

(a)

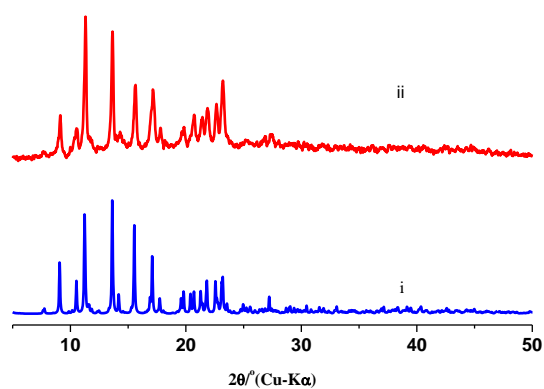

(b)

**Fig. S2.** Simulated (i) and experimental (ii) X-ray powder diffraction patterns of **1**(a) and **2** (b).

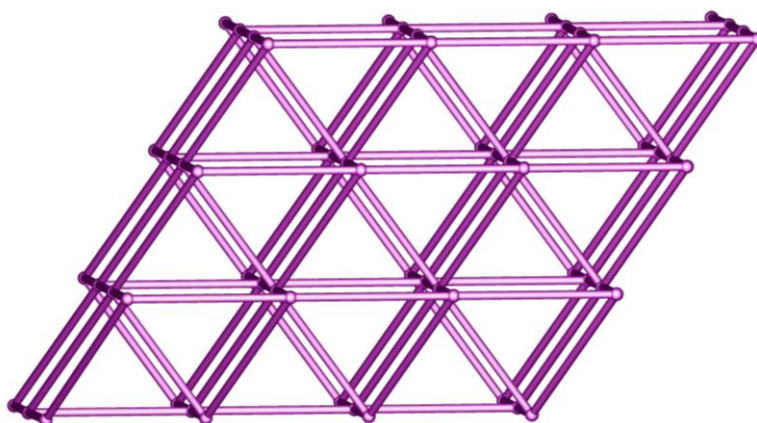

**Fig. S3.** Schematic view of the net topology of **1** If the dimeric  $[\text{Cu}(\text{COO})_2]$  units can be considered as the nodes.
